1                   **A Piezo1 Open State Reveals a Multi-fenestrated Ion Permeation Pathway**

2  
3       Wenjuan Jiang<sup>1</sup>, John Smith Del Rosario<sup>3</sup>, Wesley Botello-Smith<sup>1</sup>, Siyuan Zhao<sup>3</sup>, Yi-chun Lin<sup>1</sup>,  
4                   Han Zhang<sup>1</sup>, Jérôme Lacroix<sup>2\*</sup>, Tibor Rohacs<sup>3\*</sup>, Yun Lyna Luo<sup>1\*</sup>

5  
6       <sup>1</sup>College of Pharmacy, Western University of Health Sciences, 309 E. Second St, Pomona, CA  
7       91766, USA.

8       <sup>2</sup>Graduate College of Biomedical Sciences, Western University of Health Sciences, 309 E.  
9       Second St, Pomona, CA 91766, USA

10       <sup>3</sup>Department of Pharmacology, Physiology and Neuroscience, Rutgers, New Jersey Medical  
11       School, Newark, NJ 07103

12  
13       **\*Corresponding authors:**

14       Yun Lyna Luo: [luoy@westernu.edu](mailto:luoy@westernu.edu)

15       Tibor Rohacs: [rohacsti@njms.rutgers.edu](mailto:rohacsti@njms.rutgers.edu)

16       Jérôme Lacroix: [jlacroix@westernu.edu](mailto:jlacroix@westernu.edu)

17

18

19 **ABSTRACT**

20 Force-sensing Piezo channels are essential to many aspects of vertebrate physiology. Activation  
21 of Piezo1 is facilitated by the presence of negative membrane lipids in the inner leaflet, such as  
22 phosphatidylinositol-4,5-bisphosphate (PIP<sub>2</sub>). Here, to study how Piezo1 opens, we performed  
23 molecular dynamics simulations of Piezo1 in membranes flattened by the periodic boundary effect  
24 and with or without PIP<sub>2</sub> lipids. The Piezo1 pore spontaneously opens in the asymmetrical bilayer  
25 but not in the symmetric membrane or when PIP<sub>2</sub> lipids are neutralized. Electrophysiological  
26 characterization of putative PIP<sub>2</sub>-interacting Piezo1 residues suggests the contribution of multiple  
27 PIP<sub>2</sub> binding sites. Our Piezo1 open state recapitulates ionic selectivity, unitary conductance and  
28 mutant phenotypes obtained from numerous experimental studies. Tracking ion diffusion through  
29 the open pore reveals the presence of intracellular and extracellular fenestrations, delineating a  
30 multi-fenestrated permeation pathway. This open state sheds light on the mechanisms of lipid  
31 modulation, permeation, and selectivity in a Piezo channel.

32

33

## 34 INTRODUCTION

35 Piezos are homotrimeric mechanosensitive channels expressed at the plasma membrane of  
36 many cell types in vertebrate animals. They transduce various forms of mechanical stimuli, such  
37 as fluid flow or membrane stretch, into electrochemical signals that contribute to a large array of  
38 biological functions, including somatovisceral sensation, proprioception, vascular development,  
39 blood pressure regulation, osmotic homeostasis, and epithelial growth (1). Patients carrying gain  
40 or loss of function Piezo mutations present various disease conditions such as xerocytosis,  
41 arthrogryposis, loss of proprioception and lymphedema (2). Upregulation of Piezo2 activity  
42 correlates with inflammation-induced pain states (3), whereas gain-of-function Piezo1 variants  
43 confer Malaria resistance in humans and in animal models (4). The association between Piezo  
44 functions and disease states suggests these channels could constitute therapeutic targets for  
45 future clinical interventions.

46 Piezo channels sense mechanical cue transmitted directly from the membrane, and thus  
47 obey the so-called force-from-lipid paradigm. High-resolution cryo-electron (cryo-EM) microscopy  
48 structures of Piezo1 and Piezo2 revealed a unique molecular architecture consisting of three long  
49 peripheral transmembrane domains or arms, and a central region harboring a unique  
50 transmembrane pore and an extracellular cap domain (5-8). In these structures, the central pore,  
51 formed by three inner pore helices, is occluded by hydrophobic side chains and is too narrow to  
52 support ion conduction, indicating Piezo1 is captured in a non-conducting state. In this non-  
53 conducting conformation, the arms are arranged in tri-dimensional spirals, giving Piezos a  
54 triskelion, or propeller-like, shape when viewed perpendicularly to the membrane plane and a  
55 bowl-like shape when viewed parallel to it. This curvature around the Piezo arms creates a local  
56 curvature, or dome, in the lipid bilayer, suggests the arms sense mechanical forces transmitted  
57 from lipids by sensing tension-induced flattening of the membrane (6, 9, 10).

58 Using all-atom (AA) molecular dynamics (MD) simulations, we have recently shown that  
59 a truncated Piezo1 computational model spontaneously creates the lipid dome in a relaxed (zero

60 tension) POPC membrane (11). We also showed that the dome rapidly flattens when membrane  
61 tension is gradually increased. Despite flattening of the arms, however, the pore did not open.  
62 Since the Piezo1 arms are anticipated to act as mechanical levers, the shorter arms in our  
63 truncated model may reduce the output force (on the pore) to the input effort (arm motion).  
64 Another possibility for the absence of opening motions in the pore may have come from the  
65 symmetric property of our simulated bilayer: indeed, electrophysiological recordings showed  
66 Piezo1 remains fully closed when reconstituted in symmetrical bilayers but spontaneously opens  
67 in asymmetric bilayers containing dioleoyl-sn-glycero-3-phosphatidic acid (DOPA) or  
68 lysophosphatidic acid (LPA) in the inner leaflet (12, 13). DOPA and LPA differ in the number of  
69 fatty acid tails but are both negatively-charged. Interestingly, the presence of negatively-charged  
70 PIP<sub>2</sub> or phosphatidylserine (PS) lipids in the inner leaflet also promote channel activation (14-16).  
71 We thus reasoned that adding the missing arm regions and adding negatively charged PIP<sub>2</sub> lipids  
72 in the inner leaflet will allow us to computationally capture a Piezo1 open state.

73

74

## 75 **RESULTS**

### 76 **Piezo1 clustering induces flattening of the Piezo arms**

77 Our previous proof-of-concept AA simulation showed that the membrane curvature, or lipid dome,  
78 imposed by the resting conformation of a truncated Piezo1 takes place over 3  $\mu$ s (11). To reduce  
79 computational time, here we first used a 12  $\mu$ s Coarse-Grained (CG) Martini simulation to enable  
80 rapid lipid diffusion and dome formation while the Piezo1 backbone was kept rigid. We performed  
81 these CG simulations on both a symmetrical POPC membrane (PC:PC) and an asymmetrical  
82 POPC membrane containing 5% PIP<sub>2</sub> in the inner leaflet (PC:PC/PIP<sub>2</sub>) (**Figure 1a**, systems I and  
83 II). The CG systems were then mapped back to an AA system and simulated it for an additional  
84 2  $\mu$ s (**Figure 1a**, systems III and IV). In all MD simulations with explicit solvent, the periodic  
85 boundary conditions (PBC) create an infinite lattice where the simulated system is infinitely

86 replicated throughout virtual space. The PBC thus creates a virtual cluster of channels where  
87 proteins occupy about 32% of the total membrane area (see **Table S1** for system details).

88 The membrane deformation induced by a single Piezo1 channel (membrane footprint)  
89 extends well beyond the local dome and decays within tens of nanometers (9). Hence, when  
90 neighboring channels are closer than this distance, their footprints overlap with an angle smaller  
91 than 180 degrees, thus creating an additional energy penalty for membrane deformation. To study  
92 how this footprint overlapping affects the lipid dome and the conformation of the arms, we used a  
93 simple hyperbolic tangent model (**Figure 1b**, see Methods for details). This model suggests a  
94 biphasic behavior between footprint overlap angle ( $\theta$ ) and the inclination of the Piezo1 arm (dome  
95 angle  $\alpha$ ) (**Figure 1c**). When the dome angle  $\alpha$  is smaller than a critical value, the footprint  
96 flattening (increasing  $\theta$ ) leads to a flattening of the arms (decreased  $\alpha$ ). In contrast, when the  
97 dome angle is larger than this critical angle, the overlap flattening leads to curving the arms even  
98 more (increased  $\alpha$ ).

99 In our system, the closest distance between neighboring Piezo1 arms ( $R$ ) is around 3 nm.  
100 The height from the dome apex to the bulk membrane in absence neighboring channels ( $H$ ) is  
101 predicted to be around 14 nm (9). Thus the separation distance  $D=R/H$  is less than 1 in our  
102 simulated systems. Using these parameters, the hyperbolic tangent model predicts that the  
103 critical value of the dome angle  $\alpha$  is above 60 degrees (**Figure 1c**), which is larger than the 30°  
104 dome angle determined from cryo-EM structures. As expected for a dome angle lower than the  
105 critical value, we observed a spontaneous flattening of the overlap footprint of the lipid dome and  
106 of the Piezo1 arms in both PC:PC and PC:PC/PIP<sub>2</sub> bilayer systems (**Figure 1d and Figure S1**).  
107 During flattening, the arms also undergo a counterclockwise twist, mimicking a blooming-like  
108 motion (**Figure 1d top view**).

109

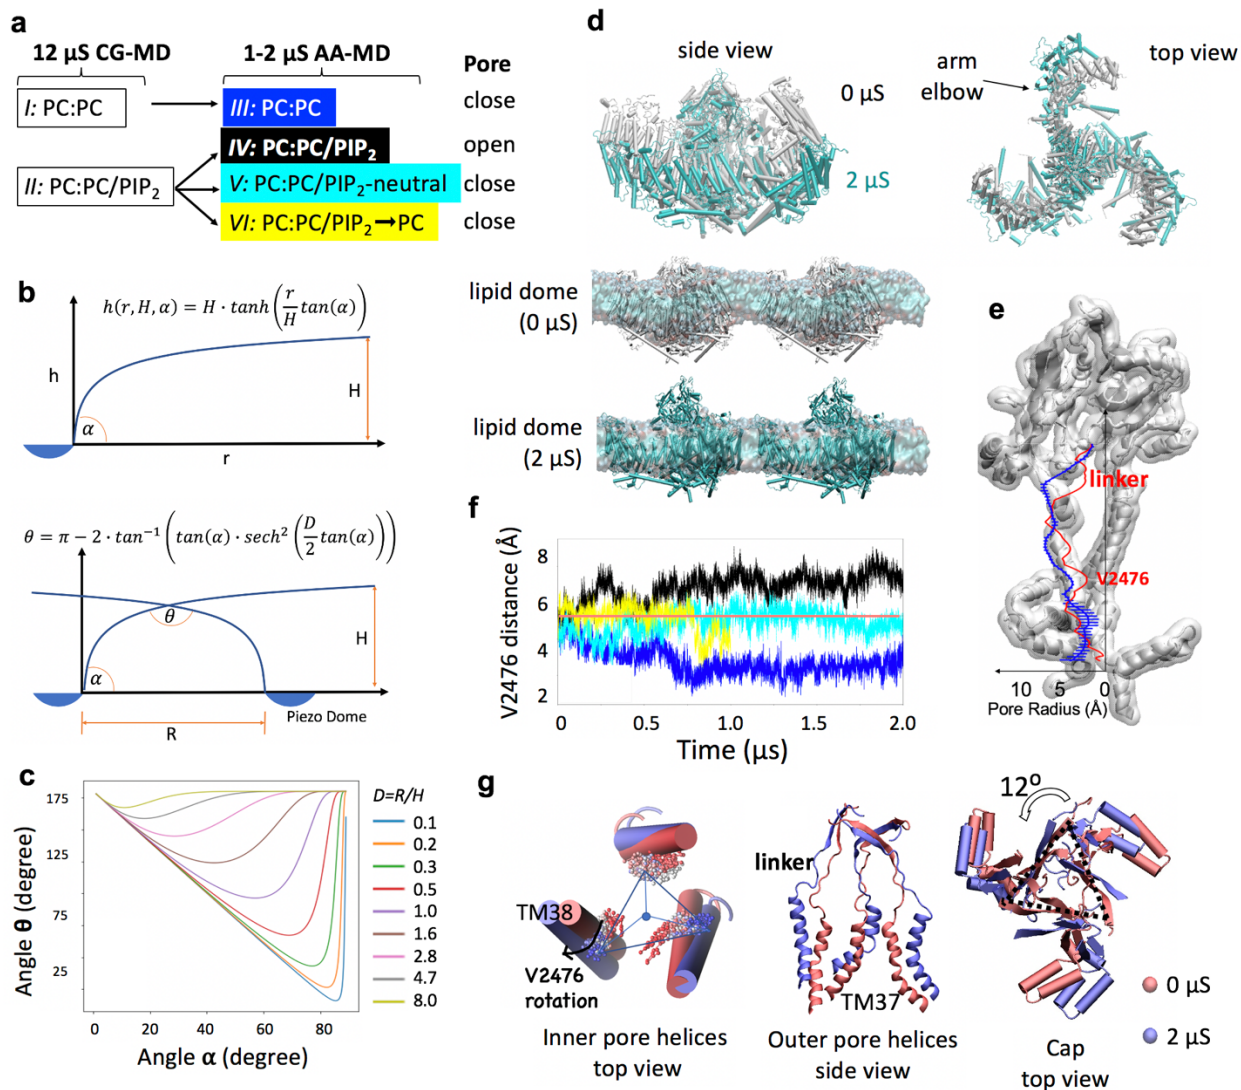

110

111 **Figure 1. Spontaneous opening of Piezo1.** (a) Summary of simulated CG systems and AA

112 systems (Table S1 for details). (b) Hyperbolic tangent model, in which  $H$  is the distance from

113 Piezo dome to the bulk membrane midplane;  $R$  is the distance between two Piezo dome

114 perimeters;  $D$  is the separation ratio  $R/H$ ;  $\alpha$  is the angle of Piezo1 arm inclination;  $\theta$  is the angle

115 of membrane footprint intersection (see Methods for details). (c) The biphasic relationship

116 between  $\alpha$  and  $\theta$ , and the dependence on the Piezo separation ratio  $D$ . (d) Overlap of a single

117 Piezo1 backbone at 0  $\mu$ s (white) and 2  $\mu$ s (cyan) of AA simulation of PC:PC/PIP<sub>2</sub> system;

118 flattening of the lipid dome between two Piezos, illustrated by the snapshots at 0 and 2  $\mu$ s of AA

119 simulation of PC:PC/PIP<sub>2</sub> system (see Figure S1 for the time evolution of arm flattening in both

120 PC:PC and PC:PC/PIP<sub>2</sub> systems). (e) Pore radius profile calculated using initial atomic  
121 coordinates (red) and the last five atomic coordinates taken from the 2  $\mu$ s AA simulation (1 ns  
122 apart) of the PC:PC/PIP<sub>2</sub> system (blue). Error bars are standard deviation. Radius profiles are  
123 overlaid on the Piezo1 pore surface, with one of the three subunits removed for clarity. The  
124 position of V2476 and linker region are indicated on the radius profile. (f) The time evolution of  
125 the radius of the Piezo1 hydrophobic gate, calculated as the nearest vertex to the centroid of three  
126 V2476 residues. The color code of the four systems is shown in panel a. The red straight line  
127 indicates the distance measured from original cryo-EM structure. (g) Comparing the  
128 conformations of Piezo1 inner pore helices (three TM38), outer pore helices (three TM37), and  
129 cap domain at 0  $\mu$ s (red) and 2  $\mu$ s (blue) of AA simulation of PC:PC/PIP<sub>2</sub> system. The rotation of  
130 the hydrophobic gate residue V2476 is illustrated by overlapping the V2476 sidechain trajectories  
131 from red to blue. The linker region that connects the cap beta-sheet (residue G2193-G2234) with  
132 TM37 is also shown.

133

### 134 **Structural changes associated with pore opening**

135 To track the pore opening, we monitored the size of the narrowest region of the pore along our  
136 AA trajectories. This region corresponds to the position of valine 2476, which has been proposed  
137 to form a hydrophobic barrier (17), occluding the pore in cryo-EM structures (**Figure 1e**). In the  
138 symmetric PC:PC membrane, the radius of the hydrophobic barrier decreases during the 2  $\mu$ s  
139 simulation from about 5  $\text{\AA}$  to 2  $\text{\AA}$ , constricting the pore even further than in cryo-EM structures  
140 (**Figure 1f**, system III: PC:PC, blue trace). In contrast, in the asymmetrical membrane, the radius  
141 of the valine barrier increases from 5  $\text{\AA}$  to 7  $\text{\AA}$  during the first 750 ns and remains above 7  $\text{\AA}$  for  
142 the remainder of the simulation (**Figure 1f**, system IV: PC:PC/PIP<sub>2</sub> in black). The widening of the  
143 hydrophobic barrier correlates with an outward tilt of the intracellular end of the inner pore helices  
144 (TM38). This tilt rotates the valine 2476 side chains away from the pore lumen, increasing its  
145 diameter (**Figure 1g**). The outer pore helices (TM37) have a larger degree of outward motion

146 **(Figure 1g)**. As a result, the pore radius at the linker region between the cap and TM37 increased  
147 **(Figure 1e)**. In addition, the cap domain shows on average 12 degrees of counter-clockwise  
148 rotation.

149

#### 150 **PIP<sub>2</sub>-mediated electrostatic interactions favor the open state**

151 To determine the contribution of the negative charges of PIP<sub>2</sub> to pore opening, we performed a  
152 second control simulation where all these charges are computationally silenced (**Figure 1a**,  
153 system V: PC:PC/PIP<sub>2</sub>-neutral). In this new system, the Piezo1 pore opening was not observed  
154 as the radius of V2476 remains the same as in cryo-EM structure over 2  $\mu$ s AA simulation (**Figure**  
155 **1f**, cyan trace). A reduction of the overall binding interactions between charge-neutralized PIP<sub>2</sub>  
156 lipids and the Piezo1 channel further confirms the electrostatic nature of these interactions  
157 (**Figure S2**). To rule out the contribution of non-electrostatic differences between PC:PC and  
158 PC:PC/PIP<sub>2</sub> simulations (such as different amino acid side chain orientations introduced by  
159 distinct CG simulations or different lipid number), we conducted a third control simulation where  
160 all 39 PIP<sub>2</sub> lipids from system IV are replaced by the same number of POPC molecules while the  
161 rest of the system is kept identical. In this system (**Figure 1af**, system VI: PC:PC/PIP<sub>2</sub>→PC,  
162 yellow trace), the pore remained closed. Taken together, the fact that all three control systems  
163 (III, V, and VI) failed to open the pore strongly suggests that PIP<sub>2</sub>-mediated lipid-protein  
164 electrostatic interactions facilitate Piezo1 opening.

165

#### 166 **Validations of our computational Piezo1 open state**

167 In cryo-EM Piezo1 structures, hydrophobic cavities are clearly seen above and below the narrow  
168 valine pore constriction. Through these conduits, POPC tails penetrate into the pore lumen during  
169 our backbone-restrained CG simulations (**Figure S3**). Such pore occlusion by membrane lipids  
170 is not uncommon and has been proposed to participate in a bona fide physiological gating in  
171 mechanosensitive MscS and TRAAK channels (18-21). Since the time needed for these lipids to



172 spontaneously leave the pore may extend beyond our 2  $\mu$ s simulation, all pore lipids were deleted  
173 at the end of the trajectory, allowing water and ions to diffuse through the pore (**Figure 2a**). This  
174 permits us to calculate the unitary ionic conductance through the pore.

175 The unitary conductance of ion channels is experimentally obtained by fitting the slope of  
176 the current vs. voltage relationship obtained from single-channel recordings. To calculate the  
177 conductance from MD simulation, constant electric fields corresponding to the transmembrane  
178 potentials of -250, -500, and -750 mV were applied perpendicular to the membrane to all the  
179 atoms in the simulation box, in the presence of symmetrical 150 mM KCl concentration. For each  
180 voltage, three consecutive 50 ns simulations were carried out to calculate the mean and standard  
181 error of the  $K^+$  and  $Cl^-$  ions permeation events. A membrane tension of 14.2 mN  $m^{-1}$  (about -10  
182 bar considering water box fluctuations) was found to be optimal to stabilize the open pore  
183 conformation throughout the trajectory at all voltages (**Figure S4** pore RMSD). The total ionic  
184 current was determined by calculating the displacement of all charges across the membrane. A  
185 least-square fitting of the I-V curve, subjecting to the constraint of zero reversal potential at  
186 symmetric salt concentration, yields the conductance of  $63 \pm 8$  pS ( $n=3$ ) (**Figure 2b**), in excellent  
187 agreement with the experimentally-obtained conductance of 60 pS in the absence of divalent  
188 cations (22).

189 In addition, the Piezo1 pore remains cation-selective across all tested voltages (**Figure**  
190 **2b**). Using the non-zero  $Cl^-$  permeation events at -500 and -750 mV simulations, we obtained a  
191  $K^+ : Cl^-$  permeation ratio in the range of 1:5 to 1:13 ( $n=3$ ). These approximated values are  
192 remarkably similar to the reported  $Na^+ : Cl^-$  permeation ratios of 1:7 and 1:13 for mouse Piezo1  
193 (23, 24).

194 We further tested whether our open state can reproduce the phenotype of a conductance-  
195 reducing mutant. The conserved glutamate 2133 residue located in the anchor region is an  
196 important determinant of channel conductance as charge neutralization mutations E2133A and  
197 E2133Q produce a two-fold reduction of unitary conductance (23). Using the open state

198 conformation, we computationally silenced the negative charge of E2133. As expected, this  
 199 charge neutralization reduced the frequency of permeation events for both  $K^+$  and  $Cl^-$  ions, leading  
 200 to a nearly two-fold reduction of the unitary conductance from  $55 \pm 8$  pS to  $30 \pm 6$  pS ( $n=3$ ) (**Figure**  
 201 **2c**).  
 202

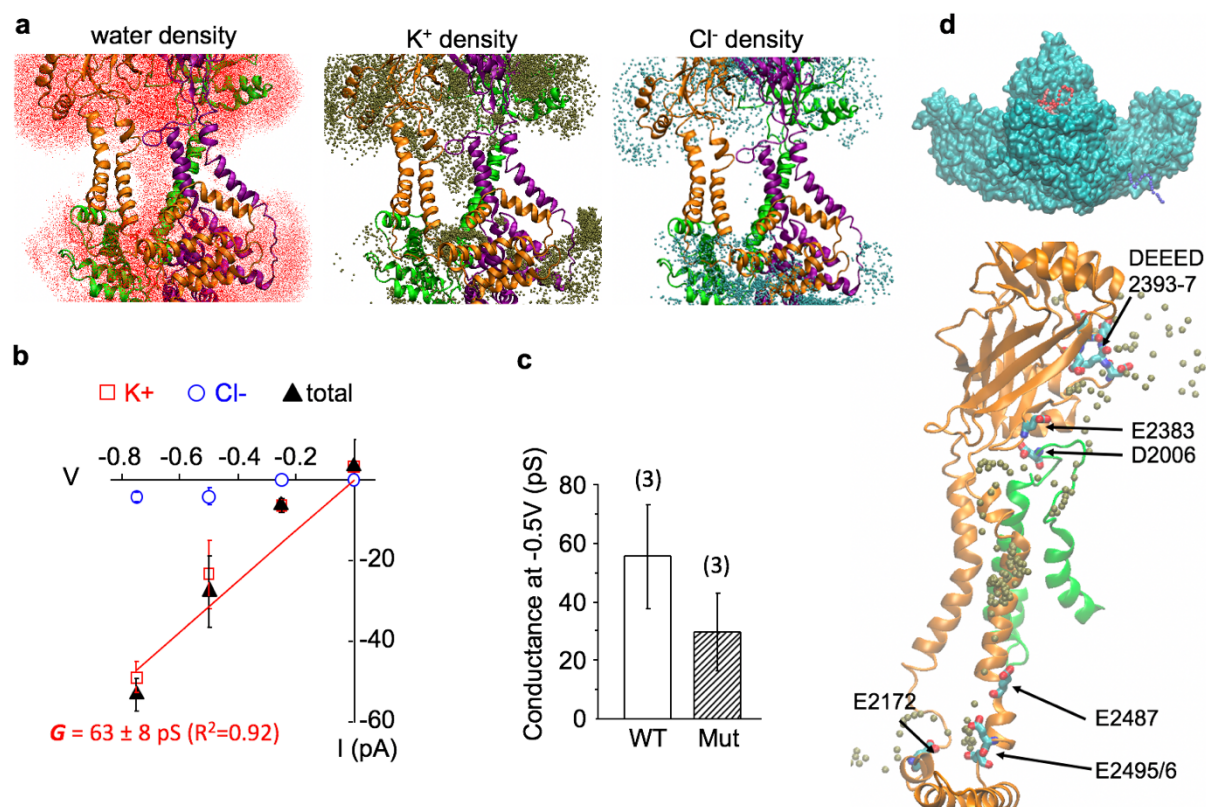

203  
 204  
 205 **Figure 2. Calculated conductance and multi-fenestrated permeation pathway of Piezo1**  
 206 **channel.** (a). Water and ion density in the Piezo1 pore from 150 ns PC:PC/PIP<sub>2</sub> simulation at -  
 207 500 mV voltage. The protein backbone is colored by subunits (orange, purple, and green). Only  
 208 inner and outer helices, part of cap and CTD domains are shown for clarity. (b). The total ionic  
 209 conductance (black triangles) and individual conductance of  $K^+$  (red open rectangles) and  $Cl^-$   
 210 (blue open circles) ions obtained from AA-MD simulation of WT Piezo1. The red line is a linear fit  
 211 of the total current. (c). Unitary conductance of WT Piezo1 (WT) and of Piezo1 where the negative

212 charge of E2133 is neutralized (Mut) during three independent 50 ns simulations at  $V = -500$  mV.  
213 (d). Representative multi-fenestrated permeation pathway (see **Video1** for single event, and  
214 **Video2** for cumulative density). Top: a 9.5 ns trajectory of a single  $K^+$  ion colored in timestep from  
215 red to blue, with the whole PIEOZ1 shown in cyan surface. Bottom: High  $K^+$  density hotspots are  
216 shown on the protein backbone of a single subunit pore region (orange), except D2006 which is  
217 located in the loop of a nearby subunit (green). The  $K^+$  is colored in brown. Hotspot residues are  
218 shown in licorice with atom color code (red oxygen, cyan carbon, blue nitrogen).

219

### 220 **Multi-fenestrated ion permeation pathway and cation-selective residues**

221 In our previous AA simulation of a truncated Piezo1, we noticed the presence of  $K^+$  ions within  
222 three intracellular fenestrations and in an intracellular pore vestibule located underneath the  
223 position of V2476. Here, the  $K^+$  permeation pathway captured under the electric field not only  
224 confirmed these intracellular fenestrations but also revealed that the extracellular ions enter the  
225 pore via wide lateral fenestrations located between the extracellular mouth of the pore and the  
226 pore-facing interface of the cap (**Figure 2d, Video 1 and 2**). The  $K^+$  density from conductance  
227 simulations revealed several hotspots along the ion permeation pathway, indicating longer  $K^+$   
228 residence time. The rim surrounding the entryway for extracellular fenestrations contains the  
229 negatively-charged residues DEED 2393-7 (DEED loop), E2383 in the cap and D2006 located in  
230 the arm in close proximity to the cap. Several negatively-charged residues are located along the  
231 narrower intracellular entryway, such as E2172 on the anchor, and E2487, E2495/6 on the inner  
232 helix (TM38) (**Figure 2d**). Experimental neutralization of many of these residues (2393-7, E2487,  
233 E2495/6) significantly reduced or abolished cation selectivity strongly supporting the twisted ion  
234 permeation pathway unraveled by our simulations (23, 24).

235

### 236 **The Piezo1 open state is consistent with intersubunit distance constraints**

237 A recent study showed that inserting an intersubunit cysteine bridge between cap residues A2328  
238 and P2382 prevents the opening of Piezo1 by cell indentation (25). The same phenotype was  
239 observed when a disulfide bridge is inserted between the cap residue E2257 and the arm residue  
240 R1762. These experimental results showed that for both pairs of residues, the inter-residue  
241 distance permits disulfide bond formation in the close state but not in the open state. We hence  
242 sought to confirm whether those two inter-residue distances are within disulfide bond formation  
243 at the beginning of our PC:PC/PIP<sub>2</sub> simulation and increase beyond disulfide bond formation  
244 during the course of the simulation. As expected, the three intersubunit A2328-P2382 distances  
245 increased from 5 Å to 8 ~ 18 Å (**Figure 3**). The A2328-P2382 pairs are located at the base of the  
246 cap, which is linked with the outer pore helices (TM37) through a linker region. The simulation  
247 trajectory shows that when the arms flatten, the base of the cap widens to enable outward motion  
248 TM37 helices (**Figure 1eg**). This widening cap motion separates A2328 and P2382 beyond  
249 disulfide bond formation. In addition, as expected during the flattening of the arms, all three  
250 E2257-R1762 distances between cap and arm increased to more than 20 Å during the trajectory  
251 (**Figure 3**). In the closed state, the cap motion is prohibited by the close contact with the arms.  
252 Thus, the cap rotation shown in **Figure 1g** is only allowed by arm flattening which breaks the cap  
253 and arm contact. Both intersubunit distances are located in the bottom part of the cap, which is  
254 consistent with the fenestration observed below the cap. The K<sup>+</sup> pathway suggests that the  
255 extracellular cations are guided into the upper vestibule of the pore by the DEED loop (residues  
256 2393-7) on the surface of the cap that reaches out to the bulk region, and then pulled down by  
257 E2383 on the bottom of the cap domain and D2006 on the loop of Piezo arm under the cap  
258 (**Figure 2d**).

259

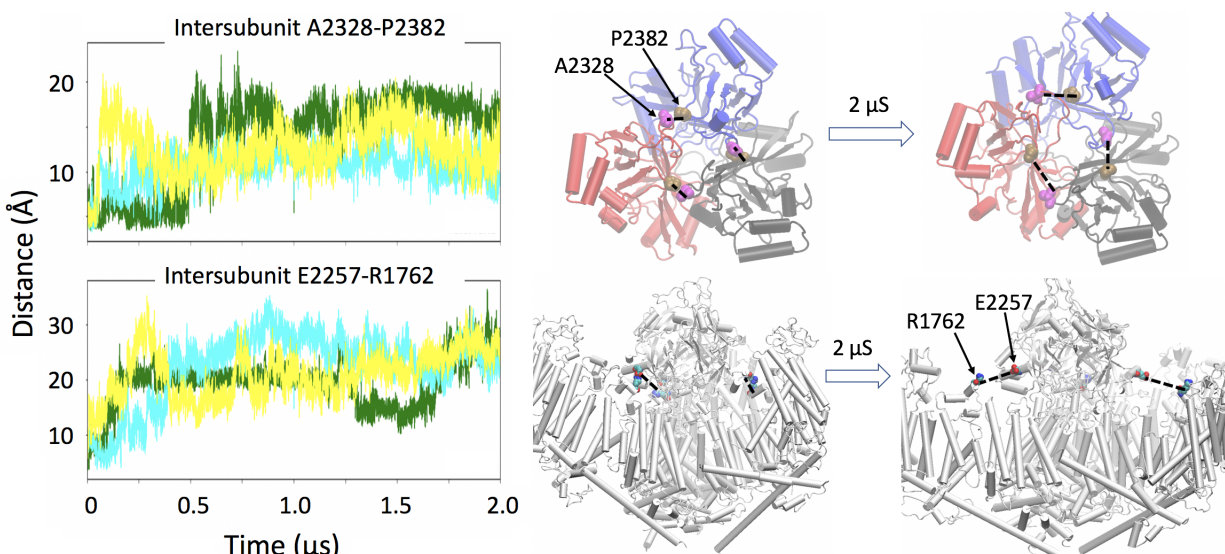

260  
261 **Figure 3. Conformational changes during Piezo1 activation are consistent with inhibitory**  
262 **disulfide bridges. (a).** Distance between  $\beta$  carbon of cross-linking residues during the simulation  
263 time. Three colors represent three pairs of intersubunit residues. **(b).** The increased distances  
264 illustrated on the protein structure at the beginning and end of the AA simulation.

265  
266 **Mutations of putative PIP<sub>2</sub> binding sites recapitulate PIP<sub>2</sub> depletion phenotype**

267 A large number of PIP<sub>2</sub> binding and unbinding events from microseconds of CG simulation and  
268 AA simulation of Piezo1 in PC:PC/PIP<sub>2</sub> bilayer allow us to identify the PIP<sub>2</sub> binding hotspot on  
269 Piezo1. Out of 143 cationic residues in each subunit of the current Piezo1 model, only 16 residues  
270 show at least one PIP<sub>2</sub> bound over 60% of 12 μs CG simulation and over 90% of 2 μs AA  
271 simulation time (844, 948/9, 1023-6, 1727/8, 2040/1, 2113, 2182-5 in **Figure 4a**). The binding  
272 distance is determined by the first minimum from the radial distribution function between  
273 arginine/lysine sidechains and the PIP<sub>2</sub> headgroups (see Methods). Those 16 residues are  
274 located at three different regions of the intracellular protein surface, namely the peripheral arm  
275 region, the convex side of the arm region, and the pore and anchor region (**Figure 4b**).

276  
277

278

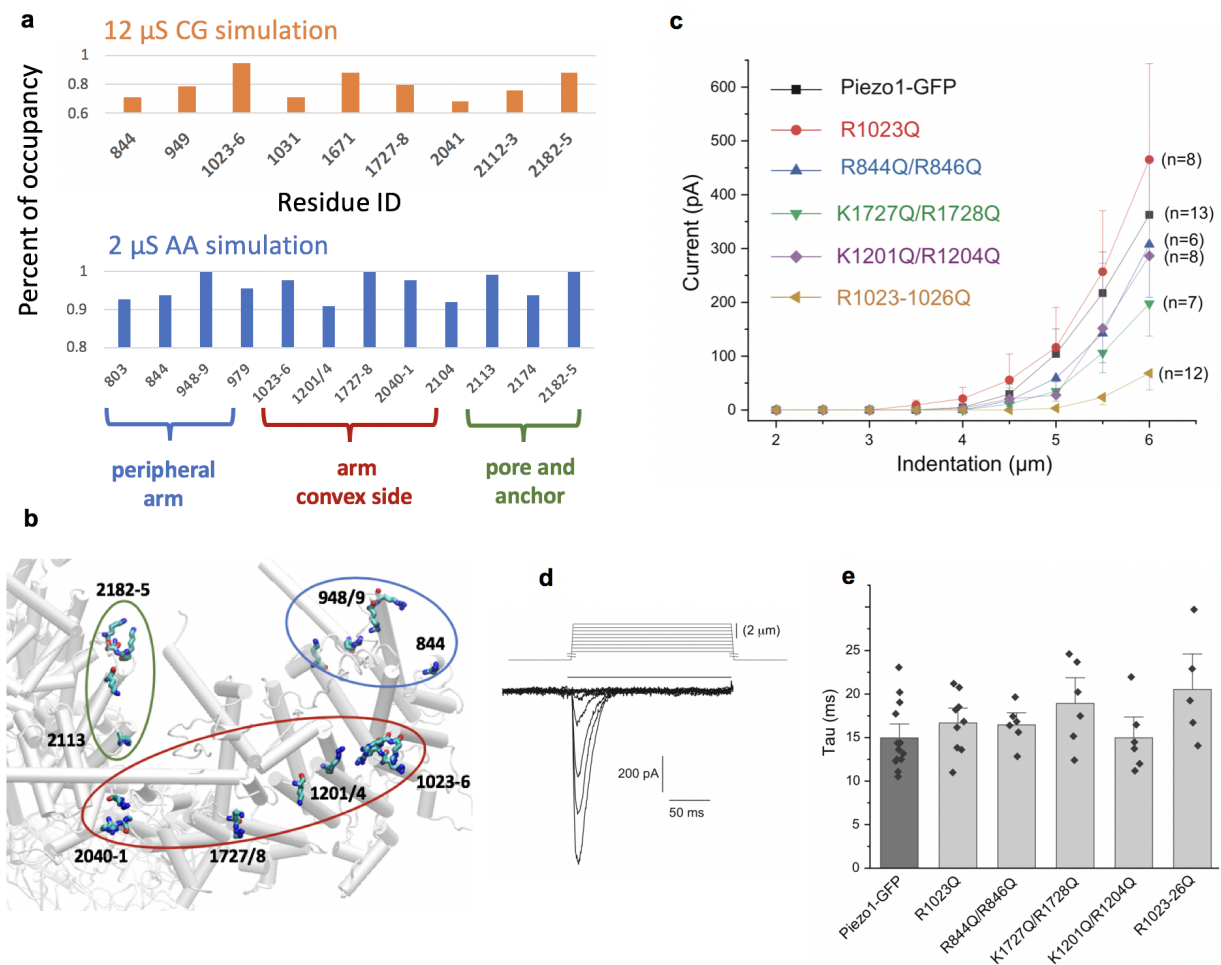

279

280 **Figure 4. The effect of mutating PIP<sub>2</sub> interacting residue clusters on Piezo1 channel**

281 **activity. (a).** The residues in mouse Piezo1 that have maximum PIP<sub>2</sub> occupancy above 60% of

282 12  $\mu$ s CG simulation or above 90% of 2  $\mu$ s CG simulation. **(b).** Hotspot residues clustered by

283 locations on the Piezo1 structure (bottom view). **(c).** Summary of current amplitudes in response

284 to increasing mechanical stimuli for wild type and mutant Piezo1 channels. Whole cell patch clamp

285 experiments on HEK293 cells transfected with the GFP-tagged mouse Piezo1 and its mutants

286 were performed as described in the methods section. **(d).** Representative trace of wild type Piezo1

287 currents in response to increasing mechanical indentations. **(e).** Summary of the inactivation time

288 constant for wild type and mutant Piezo1 currents.

289

290 To investigate whether some of those PIP<sub>2</sub> bindings are functionally relevant, we generated R/K  
291 to Q mutations to neutralize the positive charge and thus abolish PIP<sub>2</sub> binding. Nearby cationic  
292 residues were mutated together to ensure a complete loss of PIP<sub>2</sub> binding at that particular  
293 position. At the peripheral arm region (**Figure 4b**), we tested a double mutant R884/6Q, which  
294 showed a minimal reduction in current amplitudes (**Figure 4c**), and excluded the residues on the  
295 concave side of the peripheral arm as the missing sequence on the N-terminal region may lead  
296 to an overestimation of the PIP<sub>2</sub> binding. On the convex side of Piezo1 arm, PIP<sub>2</sub> binding hotspots  
297 spread the whole arm region. The double mutant K1201Q/R1204Q showed a minimal decrease  
298 in MA current amplitudes, while the K1727Q/R1728Q showed a 44% decrease at the maximal  
299 stimulation strength (**Figure 4cd**). A single mutant R1023Q at the elbow region of the Piezo1  
300 arms showed MA currents similar to that in wild type channels, however the quadruple mutant  
301 R1023-6Q showed a current reduction by ~80 %. This construct however showed visibly dimmer  
302 GFP fluorescence, therefore some of the decrease was likely due to decreased expression levels.  
303 Overall, none of the mutations abolished Piezo1 function, indicating that none of the putative  
304 individual binding sites is indispensable for mechanical activation of Piezo1. It is also consistent  
305 with previous results showing that depletion of PIP<sub>2</sub> in a cellular context does not completely  
306 abolish Piezo1 activity (14). None of the mutations changed the inactivation time constant  
307 significantly (**Figure 4e**).

308

309

## 310 **DISCUSSION**

311 The open state generated from our MD simulation not only faithfully reproduces unitary channel  
312 conductance but also recapitulates the selectivity of monovalent cations vs. anions (**Figure 2b**).  
313 We show that the main activation gate is located near V2476, as anticipated from non-conducting  
314 Piezo1 structures. Pore opening is associated with an outward motion of outer pore helices,

315 allowing tilting of inner helices and rotation of V2476 side chains away from the pore lumen  
316 (**Figure 1g**). In addition, we observed a concomitant rotation and widening of pore-facing cap  
317 sub-domains. Interestingly, rearrangements of pore-facing sub-regions of the cap have been  
318 recently shown as necessary for Piezo1 activation (25), highlighting the importance of cap  
319 flexibility in permitting channel activation (**Figure 3**).

320 The Piezo1 permeation pathway uncovered here reveals that ions enter the open pore via  
321 lateral fenestrations (one per subunit) on both the extracellular and intracellular sides (**Figure 2d,**  
322 **Video 1 and 2**). Lateral fenestrations are not uncommon as they have been identified in many  
323 families of ion channels and transporters. The multi-fenestrated permeation pathway of Piezo1 is  
324 further consistent with the observation that the deletion of a C-terminal beam-to-latch region of  
325 Piezo1, which forms a cytosolic plug under the central pore, does not yield constitutively open  
326 channels (26). We, however, do not exclude the possibility that part of the disordered loops  
327 between beam and repeat A, absent from the cryo-EM structures and our model, may gate or  
328 partial gate the intracellular fenestration (27). Our MD simulation reveals K<sup>+</sup> ions interact with  
329 basic residues (mainly glutamate) known to contribute to ion selectivity both in the extracellular  
330 and intracellular fenestrations as well as residues that have not yet been experimentally tested.  
331 Together, these observations indicate that the cation selectivity of Piezo1 is governed by multiple  
332 residue-ion electrostatic interactions clustered at both intracellular and extracellular fenestrations.

333 Our simulations underscore the exquisite interplay between local membrane geometry  
334 and Piezo1 curvature, a property highlighted from cryo-electron microscopy and atomic force  
335 microscopy studies (9, 10). The clustering effect produced by the periodic boundary condition  
336 (PBC) of MD simulations mimics a high-density channel cluster and imposes a flattening of the  
337 Piezo1-induced membrane footprints, reducing the curvature of the lipid dome and of the Piezo1  
338 arms. The Piezo1 conformational changes induced by channel clustering has two major  
339 components: a flattening of the whole arm when viewed parallel to the membrane and a  
340 straightening of the proximal N-terminal region (rotation around the elbow) when viewed



341 perpendicular to the membrane (**Figure 1d**). These conformational changes observed here due  
342 to membrane flattening are similar to the ones observed from a truncated Piezo1 simulation when  
343 applying membrane tension (11). There are three helical bundles (Piezo repeats) on the N-  
344 terminal peripheral region of the arms not present in Piezo1 cryo-EM structures. It is possible that  
345 the longer arms may increase the sensitivity to the membrane tension.

346 Interestingly, Piezo1 channels seem to form clusters when heterologously expressed in  
347 mammalian cells and this clustering has been proposed to play a role in concerted gating  
348 transitions such as collective loss of inactivation (28-30). While it is currently unclear whether  
349 endogenous Piezo1 form native clusters in vivo, these results together suggest that the gating  
350 properties of Piezo channels can be modulated by the local channel density at the plasma  
351 membrane. According to our hyperbolic tangent model, when the distance between neighboring  
352 channels is small, clustering favors flattening of the lipid dome and, consequently, of the Piezo1  
353 arms. On the contrary, if the distance between two neighboring channels becomes sufficiently  
354 large, clustering is predicted to increase the curvature of the arms (**Figure 1b**). The critical inter-  
355 channel distance separating these two scenarios depends on precise geometric parameters of  
356 the Piezo1-induced membrane footprint, which also depends on bilayer rigidity and membrane  
357 tension (9).

358 Crowding-induced membrane footprint flattening may not be the only possible mechanism  
359 underlying concerted gating in clustered Piezo channels. Cooperative gating may also be  
360 governed by direct protein-protein interactions between nearby channels or by indirect  
361 interactions mediated by auxiliary proteins (31, 32). Changes in bilayer thickness due to  
362 hydrophobic mismatch has been proposed to induce cooperative gating between neighboring  
363 MscL mechanosensitive channels, and thus could contribute to cooperative gating in Piezo  
364 channels. Other entropic contributions due to reduced membrane fluctuations in Piezo clusters  
365 may also collectively influence gating property. Whether and how those factors contribute together  
366 to the cooperative gating in Piezo clusters with different densities is of interest for further studies.

367 Future MD simulations using PBC aimed at studying Piezo1 clustering may lead to several  
368 caveats. First, due to the large size of molecular systems simulating Piezo channels and their  
369 large membrane footprints, it will be technically challenging to generate a microsecond-long  
370 trajectory of a low-density Piezo1 cluster using available computing resources. Second, channels  
371 replicated under PBC condition are mirror images of each other. Thus, MD simulations under PBC  
372 cannot replicate spatial heterogeneity of channels in a real cluster. The predicted biphasic  
373 behavior of Piezo channels under different cluster densities may be better investigated using high-  
374 resolution biophysical approaches, such as high-speed atomic force microscopy or electron cryo-  
375 electron microscopy.

376 Our MD simulations show that the presence of negatively-charged PIP<sub>2</sub>s is necessary for  
377 spontaneous Piezo1 pore opening in a 2 microseconds temporal window. This observation is  
378 consistent with the spontaneous opening of Piezo1 observed in droplet bilayers containing  
379 negatively-charged lipids in the inner leaflet (12, 13) and with the increase of the mechanical  
380 threshold for Piezo1 activation (reduction of open probability) observed in PIP<sub>2</sub>-depleted cell  
381 membranes (14). In symmetric PC:PC bilayers, mechanical stress alone is sufficient to activate  
382 Piezo1, which indicates that PIP<sub>2</sub> is not an absolute requirement for Piezo1 activation (13).  
383 Together, these results suggest PIP<sub>2</sub>s facilitate channel activation, likely by reducing the free  
384 energy difference between closed and open states. The Gibbs free energy change associated  
385 with the opening transition can be obtained from the following formula:

$$\Delta G^{(O \rightarrow C)} = -k_B T \ln\left(\frac{P_{open}}{P_{close}}\right) = -\gamma \Delta A + \Delta G_{protein} + \Delta G_{membrane}$$

386 Eq (1)

387  
388 in which  $k_B$  the Boltzmann constant,  $T$  the temperature,  $P_{open}$  and  $P_{closed}$ , respectively the  
389 probability of the channel being open and closed,  $\gamma$  the membrane tension,  $\Delta A$  the relative change  
390 in the membrane surface footprint associated with channel opening,  $\Delta G_{protein}$  the free energy of

391 protein conformational change in absence of membrane tension, and  $\Delta G_{\text{membrane}}$  the free energy  
392 of membrane deformations. Piezo1 clustering could modulate membrane deformability in  
393 absence of tension ( $\Delta G_{\text{membrane}}$ ), therefore altering the open/closed equilibrium.

394 According to equation (1), PIP<sub>2</sub>s may modulate the closed-open equilibrium of a  
395 mechanosensitive channel in several ways. First, they may alter the mechanical properties of  
396 bilayer, such as bilayer bending rigidity and bilayer area compressibility. These mechanical  
397 constants quantify the energetic cost associated with membrane deformation  $\Delta G_{\text{membrane}}$ . Second,  
398 the interactions between PIP<sub>2</sub>s and Piezo1 residues may reduce the protein conformational  
399 energy  $\Delta G_{\text{protein}}$  by destabilizing the closed state and/or stabilizing the open state. In our  
400 simulations, membrane flattening occurs regardless of the presence of PIP<sub>2</sub> lipids in the  
401 membrane. In addition, in our PC:PC/PIP<sub>2</sub> simulation, the majority of PIP<sub>2</sub> lipids remain located  
402 within atomic proximity to Piezo1, not in the bulk membrane (**Figure S2**). Hence, while we cannot  
403 rule out the possibility that PIP<sub>2</sub> lipids mediate their effects on Piezo1 by changing membrane  
404 mechanical properties, our simulations strongly suggest PIP<sub>2</sub> lipids promote Piezo1 activation by  
405 modulating channel energetics  $\Delta G_{\text{protein}}$  through direct lipid-protein interactions. Abolishing the  
406 electrostatic interactions between PIP<sub>2</sub> and PIEZO1 through charge neutralization of PIP<sub>2</sub>s  
407 resulted in a closed channel in our simulation time.

408 Our mutagenesis data shows that neutralizing mutations of putative PIP<sub>2</sub> binding residue  
409 clusters had minor effects on mechanically-induced channel activity, and even a quadruple mutant  
410 was functional, although it required stronger mechanical stimuli to open. Thus, a large number of  
411 lipid-protein interactions seem to be necessary to shift the open probability of a correspondingly  
412 large membrane protein. The binding of multiple PIP<sub>2</sub>s along the convex side of each arm may  
413 amplify the force transmitted from the lipid bilayer to the protein, reducing the tension value ( $\gamma$ )  
414 required to open the pore. This hypothesis is supported by the fact that stronger mechanical  
415 stimuli are required to open Piezo1 when membranes are PIP<sub>2</sub>-depleted (14) or when putative  
416 PIP<sub>2</sub> binding sites are mutated (**Figure 4c**). On the other hand, PIP<sub>2</sub>s may help anchor the

417 intracellular side of the arms to the inner leaflet, allowing a better mechanical coupling upon  
418 membrane deformation. Such mechanical coupling may reduce the entropic cost associated with  
419 the conformational rearrangement of the arms, an effect explained by the population-shift theory  
420 of allostery (33, 34). Finally, in addition to the change in the thermodynamic quantity, PIP<sub>2</sub> may  
421 also affect the kinetic aspect by reducing the free energy barrier for Piezo1 activation, enabling  
422 spontaneous opening in our microsecond MD simulation. However, there is no indication that  
423 Piezo1 activation kinetics slow down upon PIP<sub>2</sub> depletion (14). The interaction of PIP<sub>2</sub> with  
424 multiple binding sites on a large protein surface area of Piezo1 is in contrast to the binding of PIP<sub>2</sub>  
425 to well defined single binding sites per subunit in several other PIP<sub>2</sub> regulated ion channels, such  
426 as inwardly rectifying K<sup>+</sup> channels (35), TRPV5 channels (36), and TRPM8 channels (37). In  
427 TRPV5, the PIP<sub>2</sub>-bound structure shows an open conformation (36), compared to PIP<sub>2</sub>-free  
428 structures, indicating that binding of a single PIP<sub>2</sub> molecule per subunit is capable of inducing a  
429 conformational change to open the channel. Regulation of Piezo1 by PIP<sub>2</sub> through multiple binding  
430 sites is likely to be far more complex. Mutations of putative PIP<sub>2</sub> interacting residues had no effect  
431 on the inactivation kinetics of mechanically-activated Piezo1 currents (**Figure 4e**). The quadruple  
432 Lysine K2182-85 also showed up on our simulations as a cluster frequently interacting with PIP<sub>2</sub>  
433 (**Figure 4a**). This cluster is equivalent to residues K2166-69 in the human Piezo1 channel.  
434 Deletion of these residues is associated with xerocytosis (38) and display markedly slower  
435 inactivation of mechanically activated Piezo1 currents (39). This may indicate that PIP<sub>2</sub> binding to  
436 distinct sites in the channel have different effects on channel function. Since PIP<sub>2</sub> depletion had  
437 no significant effect on Piezo1 inactivation (14), it is also possible that the effect of those mutations  
438 on channel inactivation is independent of PIP<sub>2</sub> binding.

439 In conclusion, the Piezo1 open state generated from MD simulation produces biophysical  
440 properties consistent with a large body of published experimental data on unitary single channel  
441 conductance, selectivity, and mutant phenotypes. We revealed conformational changes  
442 associated with Piezo1 opening, including motions in the mechanosensory domains (arms),

443 outward motions of inner pore helices, twisting motion of Valine residues acting as a hydrophobic  
444 gate, and rotation of the extracellular cap domain. These motions are consistent with structure-  
445 function studies, including point mutagenesis state-dependent formation of engineered cysteine  
446 bridges. The unique multi-fenestrated ion permeation pathway captured from simulations (**Figure**  
447 **5**) are supported by experimental neutralization of residues along the pathway that reduced or  
448 abolished cation selectivity. Reproducing the phenotype of a conductance-reducing mutant  
449 provided further validation of this open conformation. In addition, we demonstrate,  
450 computationally and experimentally, that Piezo1 opening is facilitated by the presence of  
451 electrostatic interactions between PIP<sub>2</sub> lipids and multiple binding sites located along the Piezo1  
452 arm. With the availability of both Piezo1 open and close states, future computational studies of  
453 free-energy landscape of Piezo activation and allosteric network analyses, in combination with  
454 experimental studies will be helpful in understanding the molecular underpinnings of lipid  
455 modulation on Piezo channels, and provide a new avenue for mechanistic investigation of disease  
456 mutations and small molecule drug discovery.

457

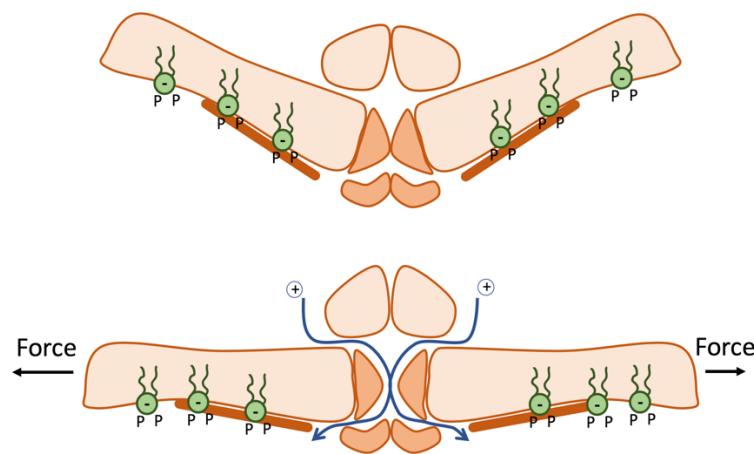

458  
459 **Figure 5. Piezo1 channel activation, facilitated by arm flattening and multiple PIP<sub>2</sub>s binding,**  
460 **reveals a multi-fenestrated ion permeation pathway.**

461

462

## 463 **METHODS**

464 **Derivation of Hyperbolic Tangent Membrane Footprint Model.** The hyperbolic tangent model  
465 was chosen to mimic two observed properties of the membrane footprint. Firstly, the membrane  
466 approaches a flat plateau when distant from the Piezo dome (although ripple-like  
467 oscillations/perturbations inherent to such membranes prevent this from being strictly monotonic).  
468 This is captured well by the hyperbolic tangent function which monotonically approaches unity as  
469 it moves away from the origin (**Figure 1b**). Thus the height of the membrane  $H$  can serve as a  
470 reduced distance unit for the hyperbolic tangent model. Secondly, the membrane footprint exhibits  
471 a ‘knee’ like bend (i.e. a point of maximal concavity/curvature). The sharpness at this knee point  
472 grows stronger as the angle of inclination of the arms of piezo increases. This can be captured in  
473 the hyperbolic tangent model by adding a scaling factor inside the hyperbolic tangent function.  
474 More specifically, this scaling constant will be equal to the slope of the hyperbolic tangent model  
475 at the origin. Thus, it may be easily related to the angle of inclination of the membrane at the edge  
476 of the piezo dome. If the arms of piezo have an angle of inclination  $\alpha$  with respect to the  $xy$  plane,  
477 the corresponding slope is given as  $\tan^{-1}(\alpha)$ . Lastly, if we place two piezo domes a distance of  
478  $D$  reduced units apart (note:  $D=R/H$ ), their membrane footprints will intersect at a minimum  
479 distance of  $D/2$  units apart. Putting this together, we attain the equation (2) below:

$$480 \quad h(x) = \tanh(m_0 \cdot x) \quad \text{Eq (2)}$$

481 where  $h(x)$  is the height of the membrane above the top of the piezo dome at a radial distance of  
482  $x$  reduced units away from the edge of the dome, and  $m_0$  is the slope of the membrane at the edge  
483 of the piezo dome. Correspondingly, we may calculate the slope of the membrane footprint under  
484 this model as in equation (3):

$$485 \quad h'(x) = m_0 \operatorname{sech}^2(m_0 \cdot x) \quad \text{Eq (3)}$$

486 where  $h'(x)$  is the slope of the membrane footprint at position  $x$ . We may then calculate the slope

487 of the membrane footprint at the point of intersection with another membrane footprint as in  
488 equation (4):

$$489 \quad m_{intersect} = m_0 \operatorname{sech}^2\left(m_0 \cdot \frac{D}{2}\right) \quad \text{Eq (4)}$$

490 where  $m_{intersect}$  is the slope of the membrane footprint model at the point where it would intersect  
491 another membrane footprint when the edges of the two domes are a distance of  $D$  reduced units  
492 apart. This slope function can be cast as the intersection angle  $\theta$  as a function of the angles of  
493 inclination of the membrane footprint at the edge of the piezo dome,  $\alpha$ . To do so, we first note that  
494 if the membranes have a slope of  $\pm m_{intersect}$  at their intersection then their corresponding angles  
495 are the inverse tangent of their slope. This angle is their effective ‘angle of inclination’ at that point,  
496 so the angle formed between them would then be pi radians minus their sum (or 180° minus their  
497 sum in degrees). This yields equation (5):

$$498 \quad \theta = \pi - 2 \cdot \tan^{-1}\left(\tan(\alpha) \cdot \operatorname{sech}^2\left(\tan(\alpha) \cdot \frac{D}{2}\right)\right) \quad \text{Eq (5)}$$

499  
500 **Coarse-Grained (CG) System Preparation.** The CG representation of Piezo 1 was constructed  
501 from our previously all-atom mouse Piezo1 model based on the cryo-EM structure (PDB ID 6B3R),  
502 which includes residue 782–1365 (Piezo repeat C-F and beam), 1493–1578 (clasp), 1655–1807  
503 (repeat B), and 1952–2546 (repeat A, anchor, TM37, cap, TM38, and CTD) (11). Based on these  
504 atomistic coordinates, the coarse-grained model using MARTINI v2.2 force field was obtained  
505 through the script *martinize.py* and *insane.py* available from the MARTINI web site (40-42). For  
506 lipids, C16:0/18:1 1-palmitoyl-2-oleoy phosphatidylcholine (POPC) follows the standard Martini  
507 2.0 lipid definitions and building block rule. A modified PI(4,5)P<sub>2</sub> MARTINI model carrying -4  
508 charge was parameterized to be consistent with the experimental data (see the section below).  
509 For all the systems, a 28.4×24.6 nm membrane bilayer was solvated with explicit water in a  
510 simulation box of 28.4 × 24.6 × 25.3 nm. 150 mM NaCl was added to each simulation and kept  
511 the whole system charge neutral. The parameterization of ions implicitly included the first

512 hydration shell around ions. The hydrated  $\text{Na}^+$  and  $\text{Cl}^-$  ions were given the “Qd” bead type with  
513 integral +1 and -1 charge, respectively. Details of the systems are listed in **Table S1**.

514  
515 **Re-parameterization of PI(4,5)P<sub>2</sub> Martini force field.** The predominant form of PIP<sub>2</sub> in the  
516 plasma membrane is PI(4,5)P<sub>2</sub> with -4 charge, which indicates one of the phosphate groups being  
517 protonated (43). The current PIP<sub>2</sub> model in Martini force field (residue name POP2) is based on  
518 PI(3,4)P<sub>2</sub> with -5 charge. Hence, the charge on bead name P2 in Martini lipid POP2 is reduced  
519 from -2 to -1. Benchmark was done to compare the Martini CG PI(4,5)P<sub>2</sub> model with the all-atom  
520 PI(4,5)P<sub>2</sub> structure (residue name SAPI24) in the CHARMM36 lipid force field (44). Since  
521 CHARMM SAPI24 has one more double bond than the Martini POP2 model, the bead name C3A  
522 is modified to D3A with its type changing from C3 to C4. PyCGTOOL was used to check the  
523 correct CG to AA mapping (45). The new Martini PI(4,5)P<sub>2</sub> model (POP5) is provided in **Table S2**.  
524 Bond length, angle pairs, and radius of gyration are calculated and compared for both the CG  
525 model and the atomistic model (**Table S3**).

526  
527 **CG simulation protocol and reverse mapping scheme.** CG simulations in the current study  
528 are designed to simply allow faster convergence of membrane topology while keeping the  
529 secondary and tertiary structure of Piezo1 intact. Hence, the protein backbones were kept rigid  
530 using positional restraint with a force constant of  $1000 \text{ kJ mol}^{-1}\text{nm}^{-2}$  and an elastic network (46)  
531 with a cutoff of 9 Å and a force constant of  $500 \text{ kJmol}^{-1}\text{nm}^{-2}$ . The convergence of the PIP<sub>2</sub> lateral  
532 diffusion was monitored by the time evolution of lateral density maps of PIP<sub>2</sub>. **Figure S5** shows  
533 the PIP<sub>2</sub>s quickly diffuse towards Piezo1 within 1 μs and remain at the annular region of the protein  
534 throughout the 12 μs trajectory.

535 All the CG simulations were executed in GROMACS (version 2016.4) simulation package  
536 with the standard Martini v2.2 simulation setting (47). The protein and membrane systems were  
537 built using a modified enhanced version of the INSANE (INSert membrane) CG building tool. All



538 lipid models and parameters used in this study follow the MARTINI v2.0 lipids, with the addition  
539 of the modified Martini PI(4,5)P<sub>2</sub> model (POP5). The overall workflow of the simulations includes  
540 the initial construction of the Piezo 1 embedded membrane, energy minimization, isothermal-  
541 isochoric (NVT) and isothermal-isobaric (NPT) equilibration runs, and NPT production runs.  
542 Briefly, each system was firstly energy minimized (steepest descent, 5000 steps) without  
543 constraints. NVT simulations were carried out for 0.5 ns at 310.15 K with a timestep of 10 fs. A  
544 time step of 20 fs was used for the following NPT simulations. A cut-off of 1.1 nm was used for  
545 calculating both the electrostatic and van der Waals interaction terms; the potential-shift-Verlet  
546 algorithm was applied to take care of both interactions by smoothly shifting beyond the cutoff.  
547 Coulomb interactions were calculated using the reaction-field algorithm implemented in  
548 GROMACS. The neighbor list was updated every 20 steps using a neighbor list cutoff equal to  
549 1.1 nm for short-range van der Waals. The temperature for each group (protein, membrane, ion,  
550 and water) was kept constant using the velocity rescale coupling algorithm with 1 ps time constant.  
551 For the NPT equilibration step, semi-isotropic pressure coupling was applied using the Berendsen  
552 algorithm, with a pressure of 1 bar independently in the cross-section of the membrane and  
553 perpendicular to the membrane with the compressibility of  $3.0 \times 10^{-4} \text{ bar}^{-1}$ . The pressure in newly  
554 built systems was relaxed in a 30 ns simulation using the Berendsen barostat with a relaxation  
555 time constant equal to 5.0 ps. Three-dimensional periodic boundary conditions were used. The  
556 production step for each system ran for 12  $\mu\text{s}$  using Parrinello-Rahman barostat with a relaxation  
557 time constant of 12.0 ps. At the end of each CG simulation, the protein and lipids were mapped  
558 into its atomistic representation using Martini backward mapping scheme. The reverse-mapped  
559 atomic structures were solvated with CHARMM TIP3P water and 150 mM KCl using the  
560 CHARMM36 force field (48).

561

562 **AA simulation protocol.** At the end of 12  $\mu\text{s}$  CG-MD simulations, the reverse-mapped System I  
563 and II were truncated to  $20.9 \times 21.9 \times 15.6 \text{ nm}^3$  (System III) and  $21.9 \times 22.7 \times 15.6 \text{ nm}^3$  (System IV)

564 in xyz dimensions, to reduce the all-atom system size to around 800,000 atoms. Two more  
565 systems (V and VI) were generated from the snapshot of System II (CG PC:PC/PIP<sub>2</sub>) at 12 μs in  
566 order to probe the role of PIP<sub>2</sub> in Piezo1 gating. System V (PIP<sub>2</sub>-neutral) was prepared by  
567 removing all 39 PIP<sub>2</sub> head group charges in GROMACS topology file from System IV  
568 (PC:PC/PIP<sub>2</sub>) and removed 156 K<sup>+</sup> ions to neutralize the system. In system VI, instead of  
569 neutralizing the PI(4,5)P<sub>2</sub> charge, all 39 PI(4,5)P<sub>2</sub> were replaced by POPC. The all-atom systems  
570 were first minimized using 50000 steepest descent cycles in GROMACS (version 2016.4)  
571 package, and then underwent six stages of equilibrium run at 310.15 K using AMBER18 CUDA  
572 package as described in our previous Piezo1 simulation (11).

573 After equilibrium run on AMBER18, the systems were run on ANTON2 supercomputer  
574 with 2.0 femtosecond (fs) timestep. Lennard-Jones interactions were truncated at 11-13 Å and  
575 long-range electrostatics were evaluated using the k-Gaussian Split Ewald method (49). Pressure  
576 regulation was accomplished via the Martyna-Tobias-Klein (MTK) barostat, to maintain 1 bar of  
577 pressure, with a tau (piston time constant) parameter of .0416667 ps and reference temperature  
578 of 310.15 K. The barostat period was set to the default value of 480 ps per timestep. Temperature  
579 control was accomplished via the Nosé-Hoover thermostat with the same tau parameter. The *mts*  
580 parameter was set to 4 timesteps for the barostat control and 1 timestep for the temperature  
581 control. The thermostat interval was set to the default value of 24 ps per timestep. A half flat-  
582 bottom harmonic restraint with spring constant of 0.12 kcal mol<sup>-1</sup> Å<sup>-1</sup> was added between center  
583 of mass of the beams (residue 1339 - 1365) and the bottom of the pore (residue 2491-2546) to  
584 prevent the C-terminal of the beams drifting more than 30 Å away from the bottom of the pore in  
585 the absence of a loop sequence from the cryo-EM data. The amphiphilic helices (residue 1493 to  
586 1553) were subjected to RMSD restraints for additional 90 ns at the beginning of Anton2  
587 simulation to ensure the helical structures remain stable for the rest of microseconds production  
588 run. Due to Anton2 cluster processing capacity, all the systems at the end of 190 ns had to be cut

589 into a smaller size (~710,000 atoms) for longer production runs. Detailed information for the  
590 number of each component is indicated in **Table S4**.

591

592 **Ionic conductance simulations of WT and mutant Piezo1.** In order to measure the ionic  
593 conductance, 16 POPC lipids from the outer membrane and 19 POPC lipids from the inner  
594 membrane were removed from the pore region. A total of 44 POPC lipids were removed to  
595 maintain the same ratio of leaflet surface. After removing the lipids in the pore, several 50 ns  
596 equilibrium simulations were conducted with and without membrane tension. It was found that a  
597 membrane tension of 14.2mN/m (around 10 bar) was necessary to remain the pore helices intact.  
598 Zero tension or higher membrane tension causes partial unfolding of the inner helices (**Figure**  
599 **S4**). Constant electric fields corresponding to the transmembrane potential of -250, -500, and -  
600 750 mV were applied perpendicular to the membrane to all the atoms in the simulation box, in the  
601 presence of symmetrical 150 mM KCl concentration and 14.2 mN/m membrane tension. In order  
602 to further validate the open state of Piezo1, the charge on three E2133 residues and three K<sup>+</sup>  
603 ions were removed. The system was equilibrated for 20ns and the conductance was measured  
604 from three consecutive 50 ns simulations under a voltage of -500mV and a membrane tension of  
605 14.2mN/m.

606

607 **PIP<sub>2</sub> binding site analysis.** The PIP<sub>2</sub> binding and unbinding events are counted by GROMACS  
608 function 'gmx select', which print out whether the atom types PC PL of PIP<sub>2</sub> headgroups are within  
609 the cut-off distance 5.7Å of carbon atom 'name CZ or CE' connecting with the charged groups of  
610 arginine/lysine residues of Piezo1 protein in 2μs AA simulation trajectory. The cut-off distance is  
611 the first minimum distance of the radial distribution function curve calculated between atom types  
612 PC PL of PIP<sub>2</sub> headgroups and carbon atom name CZ CE of the arginine/lysine residues. Similar  
613 calculation is conducted for 12μs CG simulation trajectory, which prints out whether the bead  
614 name PO4 P1 P2 of PIP<sub>2</sub> headgroups are within the cut-off distance 6.5 Å of bead name SC1 of

615 arginine/lysine residues connecting to the charged groups. The percent of occupancy is  
616 calculated as the total occupancy time divided by the simulation time per each trajectory for each  
617 cationic residue.

618

619 **Whole-cell patch clamp electrophysiology.** HEK293 cells were obtained from the American  
620 Type Culture Collection (ATCC) (catalogue number CRL-1573, RRID:CVCL\_0045) and were  
621 cultured in minimal essential medium (MEM) (Life Technologies) containing 10% (v/v) Hyclone  
622 characterized fetal bovine serum (FBS) (Thermo Scientific), and penicillin (100 IU/ml) and  
623 streptomycin (100 µg/ml; Life Technologies). Cells were used up to 25-30 passages, when a new  
624 batch with low passage number was thawed. All cultured cells were kept in humidity-controlled  
625 tissue-culture incubator with 5% CO<sub>2</sub> at 37°C. Cells were transiently transfected with cDNA  
626 encoding the mouse Piezo1 channel or its mutants tagged with GFP on its N-terminus in the  
627 pCDNA3 vector using the Effectene reagent (QIAGEN). Cells were then trypsinized and re-plated  
628 on poly-D-lysine-coated round coverslips 24 hours after transfection. Whole-cell patch clamp  
629 recordings were performed 36-72 hours after transfection at room temperature (22° to 24°C) as  
630 described previously (14). Briefly, patch pipettes were prepared from borosilicate glass capillaries  
631 (Sutter Instrument) using a P-97 pipette puller (Sutter instrument) and had a resistance of 4-7  
632 MΩ. After forming gigaohm-resistance seals, the whole cell configuration was established, and  
633 the MA currents were measured at a holding voltage of -60 mV using an Axopatch 200B amplifier  
634 (Molecular Devices) and pClamp 10. Currents were filtered at 2 kHz using low-pass Bessel filter  
635 of the amplifier and digitized using a Digidata 1440 unit (Molecular Devices). All measurements  
636 were performed with extracellular (EC) solution containing 137 mM NaCl, 5 mM KCl, 1 mM MgCl<sub>2</sub>,  
637 2 mM CaCl<sub>2</sub>, 10 mM HEPES and 10 mM glucose (pH adjusted to 7.4 with NaOH). The patch  
638 pipette solution contained 140 mM K<sup>+</sup> gluconate, 1 mM MgCl<sub>2</sub>, 0.25 mM GTP, 5 mM EGTA and  
639 10 mM HEPES (pH adjusted to 7.2 with KOH). Mechanical stimulation was performed using a  
640 heat-polished glass pipette (tip diameter, about 3 µm), controlled by a piezo-electric crystal drive

641 (Physik Instrumente) positioned at  $60^\circ$  to the surface of the cover glass as previously described  
642 (14). The probe was positioned so that 10- $\mu\text{m}$  movement did not visibly contact the cell but an  
643 11.5- $\mu\text{m}$  stimulus produced an observable membrane deflection. We applied an increasing series  
644 of mechanical steps from 12  $\mu\text{m}$  in 0.5- $\mu\text{m}$  increments every 5 s for a stimulus duration of 200  
645 ms. The inactivation kinetics from MA currents were measured by fitting the MA current with an  
646 exponential decay function in pClamp, which measured the inactivation time constant ( $\tau$ ). To  
647 calculate this time constant, we used the current evoked by the third stimulation after the threshold  
648 in the incrementally increasing step protocol in most experiments, except in cells where only the  
649 two largest stimuli evoked a current. In the latter case we used the current evoked by the largest  
650 stimulus, provided it reached 40 pA.

651

## 652 **ACKNOWLEDGMENTS**

653 This work was supported by NIH Grants GM130834 (Y.L.L. and J.J.L.), NS101384 (J.J.L.),  
654 NS055159 (T.R.), GM093290 (T.R.), GM131048 (T.R.), F31-NS100484 (J.D.R.), F99-NS113422  
655 (J.D.R.) and a WesternU intramural research award (Y.L.L. and J.J.L.). Computational resources  
656 were provided via the Extreme Science and Engineering Discovery Environment (XSEDE)  
657 allocation TG-MCB160119 (Y.L.L. and J.J.L.) and the Pittsburgh Supercomputing Center Anton2  
658 allocations PSCA17006P-18007P (Y.L.L. and J.J.L.). The XSEDE program is supported by NSF  
659 grant number ACI-154862. The Anton2 machine at PSC was generously made available by D.E.  
660 Shaw Research and the Anton2 allocation program at PSC is supported by NIH Grant GM116961.

661

## 662 **AUTHOR CONTRIBUTIONS**

663 Y.L.L, W.J., W.M.B-S., H.Z., and Y-C.L. designed and performed computer simulations; T.R.,  
664 J.J.L., and J.S.D.R. designed and performed experiments; all authors analyzed data; Y.L.L.,  
665 J.J.L., and T.R. designed the project and wrote the paper with inputs from all authors.

666

## 667 **COMPETING INTERESTS STATEMENT**

668 The authors declare no competing interests.

669

## 670 **REFERENCES**

- 671 1. J. Wu, A. H. Lewis, J. Grandl, Touch, Tension, and Transduction - The Function and  
672 Regulation of Piezo Ion Channels. *Trends Biochem Sci* **42**, 57-71 (2017).
- 673 2. S. L. Alper, Genetic Diseases of PIEZO1 and PIEZO2 Dysfunction. *Curr Top Membr* **79**,  
674 97-134 (2017).
- 675 3. A. E. Dubin *et al.*, Inflammatory signals enhance piezo2-mediated mechanosensitive  
676 currents. *Cell Rep* **2**, 511-517 (2012).
- 677 4. S. Ma *et al.*, Common PIEZO1 Allele in African Populations Causes RBC Dehydration and  
678 Attenuates Plasmodium Infection. *Cell* **173**, 443-455 e412 (2018).
- 679 5. Q. Zhao *et al.*, Structure and mechanogating mechanism of the Piezo1 channel. *Nature*  
680 **554**, 487-492 (2018).
- 681 6. Y. R. Guo, R. MacKinnon, Structure-based membrane dome mechanism for Piezo  
682 mechanosensitivity. *eLife* **6**, (2017).
- 683 7. K. Saotome *et al.*, Structure of the mechanically activated ion channel Piezo1. *Nature* **554**,  
684 481-486 (2018).
- 685 8. L. Wang *et al.*, Structure and mechanogating of the mammalian tactile channel PIEZO2.  
686 *Nature* **573**, 225-229 (2019).
- 687 9. C. A. Haselwandter, R. MacKinnon, Piezo's membrane footprint and its contribution to  
688 mechanosensitivity. *eLife* **7**, e41968 (2018).
- 689 10. Y. C. Lin *et al.*, Force-induced conformational changes in PIEZO1. *Nature* **573**, 230-234  
690 (2019).
- 691 11. W. M. Botello-Smith *et al.*, A mechanism for the activation of the mechanosensitive Piezo1  
692 channel by the small molecule Yoda1. *Nature Communications* **10**, 1-10 (2019).
- 693 12. B. Coste *et al.*, Piezo proteins are pore-forming subunits of mechanically activated  
694 channels. *Nature* **483**, 176-181 (2012).
- 695 13. R. Syeda *et al.*, Piezo1 Channels Are Inherently Mechanosensitive. *Cell Rep* **17**, 1739-  
696 1746 (2016).
- 697 14. I. Borbiri, D. Badheka, T. Rohacs, Activation of TRPV1 channels inhibits  
698 mechanosensitive Piezo channel activity by depleting membrane phosphoinositides. *Sci*  
699 *Signal* **8**, ra15 (2015).

- 700 15. P. Narayanan *et al.*, Myotubularin related protein-2 and its phospholipid substrate PIP2  
701 control Piezo2-mediated mechanotransduction in peripheral sensory neurons. *eLife* **7**,  
702 e32346 (2018).
- 703 16. M. Tsuchiya *et al.*, Cell surface flip-flop of phosphatidylserine is critical for PIEZO1-  
704 mediated myotube formation. *Nature Communications* **9**, 1-15 (2018).
- 705 17. W. Zheng, E. O. Gracheva, S. N. Bagriantsev, A hydrophobic gate in the inner pore helix  
706 is the major determinant of inactivation in mechanosensitive Piezo channels. *eLife* **8**,  
707 e44003 (2019).
- 708 18. S. G. Brohawn *et al.*, The mechanosensitive ion channel TRAAK is localized to the  
709 mammalian node of Ranvier. *eLife* **8**, e50403 (2019).
- 710 19. R. B. Bass, P. Strop, M. Barclay, D. C. Rees, Crystal structure of Escherichia coli MscS,  
711 a voltage-modulated and mechanosensitive channel. *Science*, (2002).
- 712 20. I. R. Booth, P. Blount, The MscS and MscL Families of Mechanosensitive Channels Act  
713 as Microbial Emergency Release Valves. *J. Bacteriol.* **194**, 4802-4809 (2012).
- 714 21. S. G. Brohawn, J. del Marmol, R. MacKinnon, Crystal structure of the human K2P TRAAK,  
715 a lipid- and mechano-sensitive K<sup>+</sup> ion channel. *Science* **335**, 436-441 (2012).
- 716 22. B. Coste *et al.*, Piezo1 and Piezo2 are essential components of distinct mechanically  
717 activated cation channels. *Science* **330**, 55-60 (2010).
- 718 23. B. Coste *et al.*, Piezo1 ion channel pore properties are dictated by C-terminal region.  
719 *Nature Communications* **6**, 7223 (2015).
- 720 24. Q. Zhao *et al.*, Ion Permeation and Mechanotransduction Mechanisms of  
721 Mechanosensitive Piezo Channels. *Neuron* **89**, 1248-1263 (2016).
- 722 25. A. H. Lewis, J. Grandl, Inactivation Kinetics and Mechanical Gating of Piezo1 Ion  
723 Channels Depend on Subdomains within the Cap. *Cell Rep* **30**, 870-880.e872 (2020).
- 724 26. F. J. Taberner *et al.*, Structure-guided examination of the mechanogating mechanism of  
725 PIEZO2. *Proc Natl Acad Sci U S A* **116**, 14260-14269 (2019).
- 726 27. J. Geng *et al.*, A Plug-and-Latch Mechanism for Gating the Mechanosensitive Piezo  
727 Channel. *Neuron*, (2020).
- 728 28. C. Bae, R. Gnanasambandam, C. Nicolai, F. Sachs, P. A. Gottlieb, Xerocytosis is caused  
729 by mutations that alter the kinetics of the mechanosensitive channel PIEZO1. *PNAS* **110**,  
730 E1162-E1168 (2013).
- 731 29. P. Ridone *et al.*, Disruption of membrane cholesterol organization impairs the concerted  
732 activity of PIEZO1 channel clusters. *bioRxiv*, 604488 (2019).
- 733 30. K. L. Ellefsen *et al.*, Myosin-II mediated traction forces evoke localized Piezo1-dependent  
734 Ca<sup>2+</sup> flickers. *Commun Biol* **2**, 298 (2019).
- 735 31. T. Zhang, S. Chi, F. Jiang, Q. Zhao, B. Xiao, A protein interaction mechanism for  
736 suppressing the mechanosensitive Piezo channels. *Nat Commun* **8**, 1797 (2017).
- 737 32. K. Poole, R. Herget, L. Lapatsina, H. D. Ngo, G. R. Lewin, Tuning Piezo ion channels to  
738 detect molecular-scale movements relevant for fine touch. *Nat Commun* **5**, 3520 (2014).
- 739 33. D. Long, R. Brüsweiler, Atomistic Kinetic Model for Population Shift and Allostery in  
740 Biomolecules. *J. Am. Chem. Soc.* **133**, 18999-19005 (2011).
- 741 34. R. Ravasio *et al.*, Mechanics of allostery: contrasting the induced fit and population shift  
742 scenarios. *Biophysical Journal* **117**, 1954-1962 (2019).
- 743 35. S. B. Hansen, X. Tao, R. MacKinnon, Structural basis of PIP 2 activation of the classical  
744 inward rectifier K<sup>+</sup> channel Kir2.2. *Nature* **477**, 495-498 (2011).
- 745 36. T. E. T. Hughes *et al.*, Structural insights on TRPV5 gating by endogenous modulators.  
746 *Nature Communications* **9**, 1-11 (2018).
- 747 37. Y. Yin *et al.*, Structural basis of cooling agent and lipid sensing by the cold-activated  
748 TRPM8 channel. *Science* **363**, (2019).
- 749 38. I. Andolfo *et al.*, Multiple clinical forms of dehydrated hereditary stomatocytosis arise from  
750 mutations in PIEZO1. *Blood* **121**, 3925-3935 (2013).

- 751 39. A. Buyan *et al.*, Piezo1 Induces Local Curvature in a Mammalian Membrane and Forms  
752 Specific Protein-Lipid Interactions. *bioRxiv*, 787531 (2019).
- 753 40. D. H. de Jong *et al.*, Improved Parameters for the Martini Coarse-Grained Protein Force  
754 Field. *J Chem Theory Comput* **9**, 687-697 (2013).
- 755 41. T. A. Wassenaar, H. I. Ingólfsson, R. A. Böckmann, D. P. Tieleman, S. J. Marrink,  
756 Computational Lipidomics with *insane* : A Versatile Tool for Generating Custom  
757 Membranes for Molecular Simulations. *J Chem Theory Comput* **11**, 2144-2155 (2015).
- 758 42. S. J. Marrink, H. J. Risselada, S. Yefimov, D. P. Tieleman, A. H. de Vries, The MARTINI  
759 Force Field: Coarse Grained Model for Biomolecular Simulations. *J. Phys. Chem. B* **111**,  
760 7812-7824 (2007).
- 761 43. S. McLaughlin, J. Wang, A. Gambhir, D. Murray, PIP2 and Proteins: Interactions,  
762 Organization, and Information Flow. *Annu. Rev. Biophys. Biomol. Struct.* **31**, 151-175  
763 (2002).
- 764 44. J. B. Klauda *et al.*, Update of the CHARMM all-atom additive force field for lipids: validation  
765 on six lipid types. *J Phys Chem B* **114**, 7830-7843 (2010).
- 766 45. J. A. Graham, J. W. Essex, S. Khalid, PyCGTOOL: Automated Generation of Coarse-  
767 Grained Molecular Dynamics Models from Atomistic Trajectories. *J. Chem. Inf. Model.* **57**,  
768 650-656 (2017).
- 769 46. X. Periole, M. Cavalli, S.-J. Marrink, M. A. Ceruso, Combining an Elastic Network With a  
770 Coarse-Grained Molecular Force Field: Structure, Dynamics, and Intermolecular  
771 Recognition. *J Chem Theory Comput* **5**, 2531-2543 (2009).
- 772 47. S. Pronk *et al.*, GROMACS 4.5: a high-throughput and highly parallel open source  
773 molecular simulation toolkit. *Bioinformatics* **29**, 845-854 (2013).
- 774 48. R. B. Best *et al.*, Optimization of the additive CHARMM all-atom protein force field  
775 targeting improved sampling of the backbone phi, psi and side-chain chi(1) and chi(2)  
776 dihedral angles. *J Chem Theory Comput* **8**, 3257-3273 (2012).
- 777 49. Y. Shan, J. L. Klepeis, M. P. Eastwood, R. O. Dror, D. E. Shaw, Gaussian split Ewald: A  
778 fast Ewald mesh method for molecular simulation. *The Journal of Chemical Physics* **122**,  
779 054101 (2005).

780

781



## 782 SUPPLEMENTARY MATERIALS

783

784 **Video 1. A single potassium permeation event.** Trajectory of a permeating  $K^+$  ion during 9.5  
785 ns simulation under -750 mV voltage. The backbone of the Piezo1 cap and pore domain is shown  
786 in orange. The DEED residues are shown in licorice with the atom color code (red oxygen, blue  
787 nitrogen, cyan carbon).

788

789 **Video 2. Accumulated potassium density along a multi-fenestrated pathway.** The isosurface  
790 of the  $K^+$  density calculated from 17 permeation events under -750 mV voltage. Density contours  
791 are shown at a level of  $0.31 \text{ \AA}^{-3}$ . The protein backbone is in cyan and hotspot residues in red  
792 licorice.

793

794

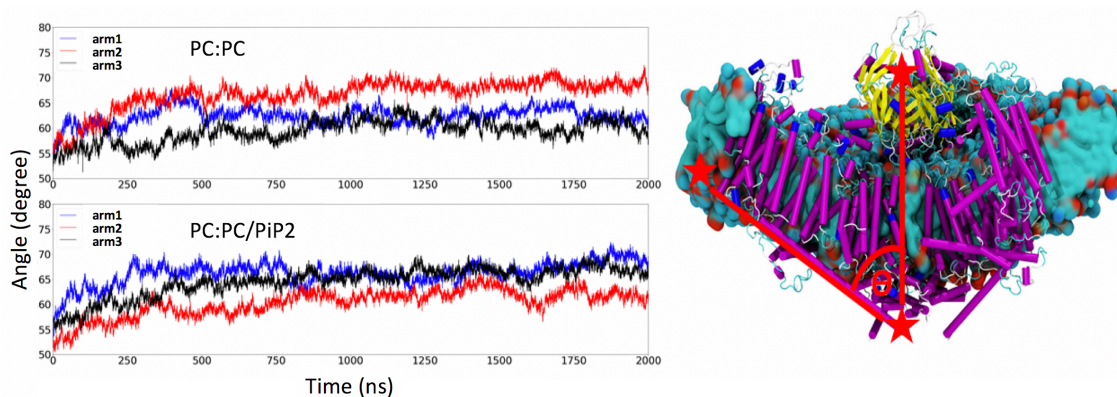

795

796 **Figure S1:** Angles of Piezo1 arms in PC:PC and PC:PC/PIP<sub>2</sub> bilayer systems, showing the  
797 spontaneous flattening in crowded simulation environment.

798

799

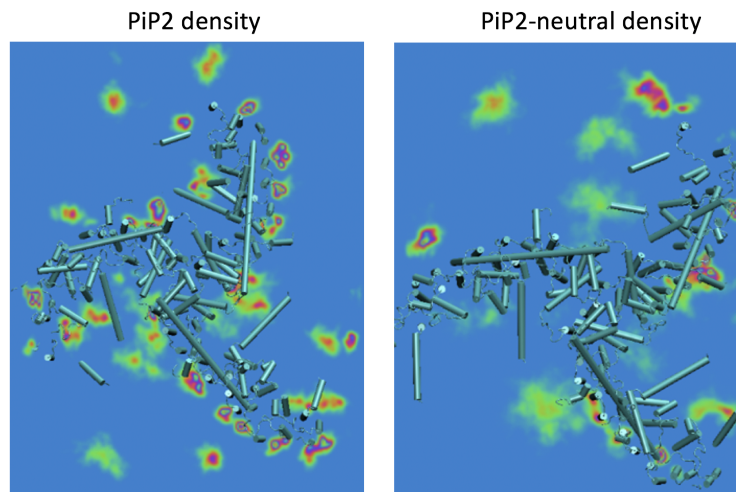

800

801 **Figure S2:** Average density of PIP<sub>2</sub> lipids around Piezo1 (bottom view), calculated from the last

802 100 ns of 2  $\mu$ S AA-MD simulations.

803

804

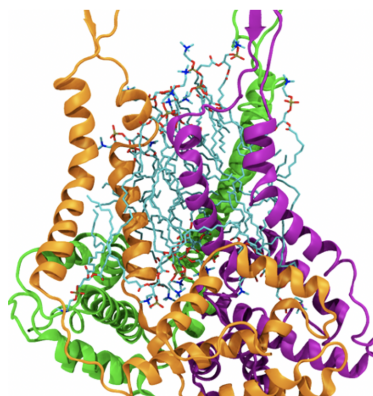

805

806 **Figure S3:** POPC lipids inside the Piezo1 pore in CG-MD simulations of Piezo1 in PC:PC/PIP<sub>2</sub>

807 bilayer. Lipids are shown in licorice with atom color code (red oxygen, blue nitrogen, cyan carbon,

808 old phosphorus). The backbone of Piezo1 pore is shown in newcartoon mode with different colors

809 for each subunit (orange, green, and purple).

810

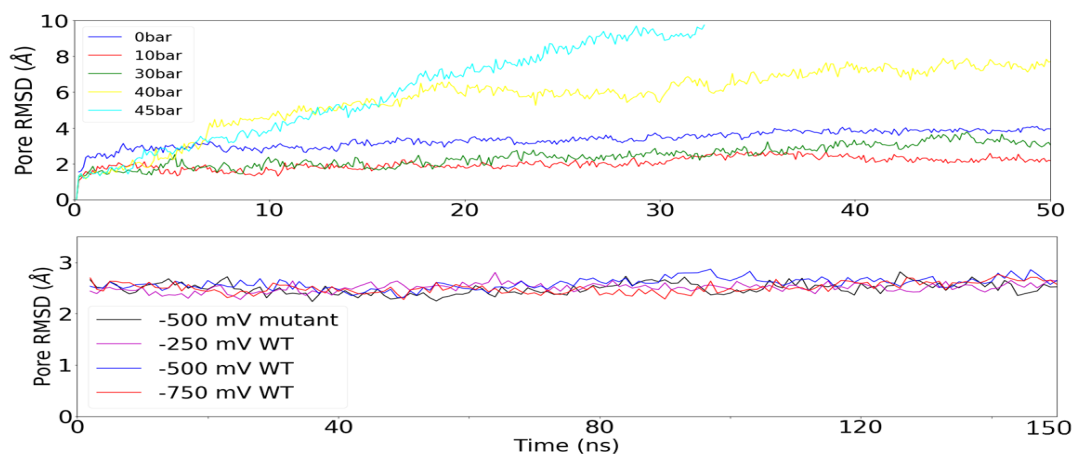

811  
812 **Figure S4:** Root-mean-square deviation (RMSD) of inner pore helices of PIEOZ1 under different  
813 membrane tensions without voltage (top) and under different voltages with 10 bar tension  
814 (bottom).  
815

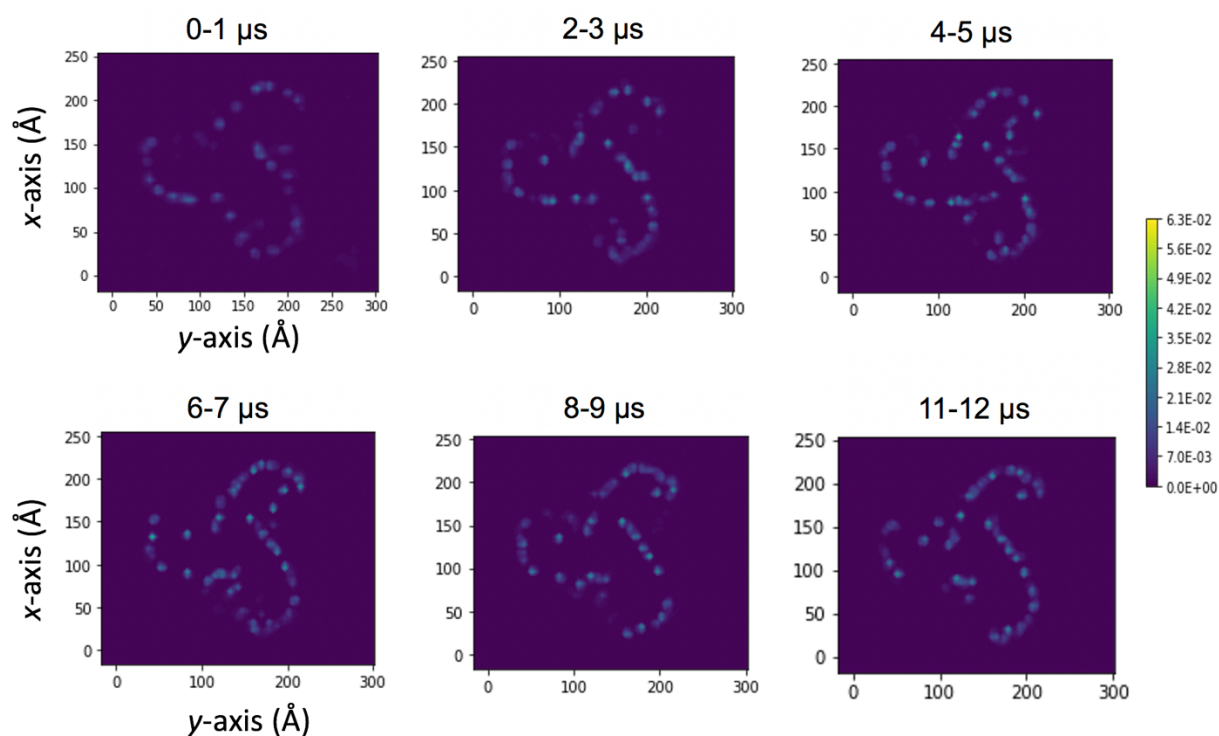

816  
817 **Figure S5:** 2D lateral density maps of PIP<sub>2</sub> at lower leaflet over CG simulation trajectory.  
818  
819

820 **Table S1. Details of CG Piezo 1 and AA Piezo 1 simulation systems.**

| System |     |                       | Inner |      | Outer | no. of |                 |                 |
|--------|-----|-----------------------|-------|------|-------|--------|-----------------|-----------------|
|        |     |                       | PC    | PIP2 | PC    | Water  | Na <sup>+</sup> | Cl <sup>-</sup> |
| CG     | I   | PC:PC                 | 872   | 0    | 952   | 109763 | 1174            | 1243            |
|        | II  | PC:PC/PIP2            | 831   | 41   | 951   | 109414 | 1252            | 1157            |
| AA     | III | PC:PC                 | 565   | 0    | 611   | 184522 | 590             | 759             |
|        | IV  | PC:PC/PIP2            | 587   | 39   | 664   | 185688 | 799             | 712             |
|        | V   | PC:PC/PIP2<br>neutral | 587   | 39   | 664   | 185688 | 643             | 712             |
|        | VI  | PC:PC/PIP2<br>→PC     | 626   | 0    | 664   | 186112 | 712             | 781             |

821

822 **Table S2a. GROMACS topology file (bead type) for Martini PI(4,5)P2 model**

| nr | type | resnr | residue | atom | cgnr | charge |
|----|------|-------|---------|------|------|--------|
| 1  | P1   | 1     | POP5    | C1   | 1    | 0      |
| 2  | Na   | 1     | POP5    | C2   | 2    | 0      |
| 3  | P4   | 1     | POP5    | C3   | 3    | 0      |
| 4  | Qa   | 1     | POP5    | PO4  | 4    | -1.0   |
| 5  | Qa   | 1     | POP5    | P1   | 5    | -2.0   |
| 6  | Qa   | 1     | POP5    | P2   | 6    | -1.0   |
| 7  | Na   | 1     | POP5    | GL1  | 7    | 0      |
| 8  | Na   | 1     | POP5    | GL2  | 8    | 0      |
| 9  | C1   | 1     | POP5    | C1A  | 9    | 0      |
| 10 | C4   | 1     | POP5    | D2A  | 10   | 0      |
| 11 | C4   | 1     | POP5    | D3A  | 11   | 0      |
| 12 | C1   | 1     | POP5    | C4A  | 12   | 0      |
| 13 | C1   | 1     | POP5    | C1B  | 13   | 0      |
| 14 | C1   | 1     | POP5    | C2B  | 14   | 0      |

|    |    |   |      |     |    |   |
|----|----|---|------|-----|----|---|
| 15 | C1 | 1 | POP5 | C3B | 15 | 0 |
| 16 | C1 | 1 | POP5 | C4B | 16 | 0 |

823

824 **Table S2b. GROMACS topology file (bone length) for Martini PI(4,5)P2 model**

| i  | j  | funct | length | force |
|----|----|-------|--------|-------|
| 1  | 2  | 1     | 0.40   | 30000 |
| 1  | 3  | 1     | 0.40   | 30000 |
| 2  | 3  | 1     | 0.40   | 30000 |
| 2  | 5  | 1     | 0.30   | 25000 |
| 2  | 6  | 1     | 0.35   | 30000 |
| 1  | 5  | 1     | 0.40   | 25000 |
| 3  | 6  | 1     | 0.31   | 30000 |
| 5  | 6  | 1     | 0.60   | 25000 |
| 1  | 4  | 1     | 0.35   | 1250  |
| 4  | 7  | 1     | 0.47   | 1250  |
| 7  | 8  | 1     | 0.37   | 1250  |
| 7  | 9  | 1     | 0.47   | 1250  |
| 9  | 10 | 1     | 0.47   | 1250  |
| 10 | 11 | 1     | 0.47   | 1250  |
| 11 | 12 | 1     | 0.47   | 1250  |
| 8  | 13 | 1     | 0.47   | 1250  |
| 13 | 14 | 1     | 0.47   | 1250  |
| 14 | 15 | 1     | 0.47   | 1250  |
| 15 | 16 | 1     | 0.47   | 1250  |

825

826 **Table S2c. GROMACS topology file (angles) for Martini PI(4,5)P2 model**

| i | j | k  | funct | angle | force |
|---|---|----|-------|-------|-------|
| 1 | 4 | 7  | 2     | 140.0 | 25.0  |
| 7 | 9 | 10 | 2     | 180.0 | 25.0  |

|    |    |    |   |       |      |
|----|----|----|---|-------|------|
| 9  | 10 | 11 | 2 | 100.0 | 10.0 |
| 10 | 11 | 12 | 2 | 120.0 | 45.0 |
| 8  | 13 | 14 | 2 | 180.0 | 25.0 |
| 13 | 14 | 15 | 2 | 180.0 | 25.0 |
| 14 | 15 | 16 | 2 | 180.0 | 25.0 |

827

828 **Table S2d. GROMACS topology file (constraints) for Martini PI(4,5)P2 model**

| i | j | funct | length |
|---|---|-------|--------|
| 1 | 2 | 1     | 0.40   |
| 1 | 3 | 1     | 0.40   |
| 2 | 3 | 1     | 0.40   |
| 2 | 5 | 1     | 0.30   |
| 2 | 6 | 1     | 0.35   |
| 1 | 5 | 1     | 0.40   |
| 3 | 6 | 1     | 0.31   |

829

830 **Table S3a. Bond length comparison between CG and AA model for PI(4,5)P2**

| Bond Pairs | Atom Model(nm) | CG model (nm) | Difference (nm) | %Diff  |
|------------|----------------|---------------|-----------------|--------|
| C1_C2      | 0.27           | 0.40          | 0.13            | 46.82  |
| C1_C3      | 0.32           | 0.40          | 0.08            | 24.84  |
| C2_C3      | 0.27           | 0.40          | 0.13            | 46.02  |
| C2_P1      | 0.33           | 0.30          | -0.03           | -9.41  |
| C2_P2      | 0.33           | 0.35          | 0.02            | 5.69   |
| C1_P1      | 0.44           | 0.40          | -0.04           | -8.64  |
| C3_P2      | 0.43           | 0.31          | -0.12           | -28.11 |
| P1_P2      | 0.61           | 0.60          | -0.01           | -1.03  |

|         |      |      |       |        |
|---------|------|------|-------|--------|
| C1_PO4  | 0.34 | 0.31 | -0.02 | -6.08  |
| PO4_GL1 | 0.43 | 0.45 | 0.02  | 3.34   |
| GL1_GL2 | 0.27 | 0.35 | 0.08  | 29.61  |
| GL1_C1A | 0.51 | 0.46 | -0.05 | -9.90  |
| C1A_D2A | 0.44 | 0.45 | 0.01  | 2.14   |
| D2A_D3A | 0.52 | 0.45 | -0.07 | -13.34 |
| D3A_C4A | 0.52 | 0.45 | -0.06 | -12.11 |
| GL2_C1B | 0.63 | 0.45 | -0.18 | -28.22 |
| C1B_C2B | 0.52 | 0.45 | -0.07 | -14.09 |
| C2B_C3B | 0.47 | 0.45 | -0.03 | -5.30  |
| C3B_C4B | 0.47 | 0.45 | -0.02 | -4.01  |

831

832 **Table S3b. Angle comparison between CG and AA model for PI(4,5)P2**

| Angle Pairs | Atom Model (degrees) | CG model (degrees) | Difference (degrees) | %Diff  |
|-------------|----------------------|--------------------|----------------------|--------|
| C1_PO4_GL1  | 101.35               | 132.26             | 30.92                | 30.51  |
| GL1_C1A_D2A | 107.09               | 141.37             | 34.28                | 32.01  |
| C1A_D2A_D3A | 109.43               | 92.07              | -17.37               | -15.87 |
| D2A_D3A_C4A | 105.27               | 118.42             | 13.15                | 12.49  |
| GL2_C1B_C2B | 110.94               | 138.13             | 27.19                | 24.51  |
| C1B_C2B_C3B | 138.20               | 136.60             | -1.61                | -1.16  |
| C2B_C3B_C4B | 134.62               | 137.64             | 3.02                 | 2.24   |

833

834 **Table S3c. Radius of gyration comparison between CG and AA model for PI(4,5)P2**

| PI(4,5)P2              | Atom model | CG model | Difference | %Diff |
|------------------------|------------|----------|------------|-------|
| Radius of Gyration(nm) | 0.77       | 0.81     | 0.04       | 5.28  |

835

836 **Table S4. Details of extended all-atom Piezo 1 simulation systems**

| System  | Inner |      | Outer | no. of |                |                 | Time (ns) |
|---------|-------|------|-------|--------|----------------|-----------------|-----------|
|         | POPC  | PIP2 | POPC  | Water  | K <sup>+</sup> | Cl <sup>-</sup> |           |
| III-ext | 545   | 0    | 602   | 155033 | 623            | 692             | 2000      |
| IV-ext  | 537   | 38   | 607   | 160133 | 695            | 612             | 2000      |
| V-ext   | 517   | 37   | 593   | 151401 | 605            | 674             | 1810      |
| VI-ext  | 508   | 0    | 566   | 144154 | 583            | 652             | 810       |

837
